# Supplementary material for: IL-9 promotes the pathogenesis of ulcerative colitis through STAT3/SOCS3 signaling
Source: Oxford University Press journal article supplement (doi:10.1042/bsr20181521), 2018-10-28
Supplement: bsr20181521_supp1.pdf [file bsr20181521_supp1.pdf]

1 **Supplemental information**

2 **Supplemental figure 1. Expression of human inflammatory cytokines in serum from**  
3 **patients with UC.**

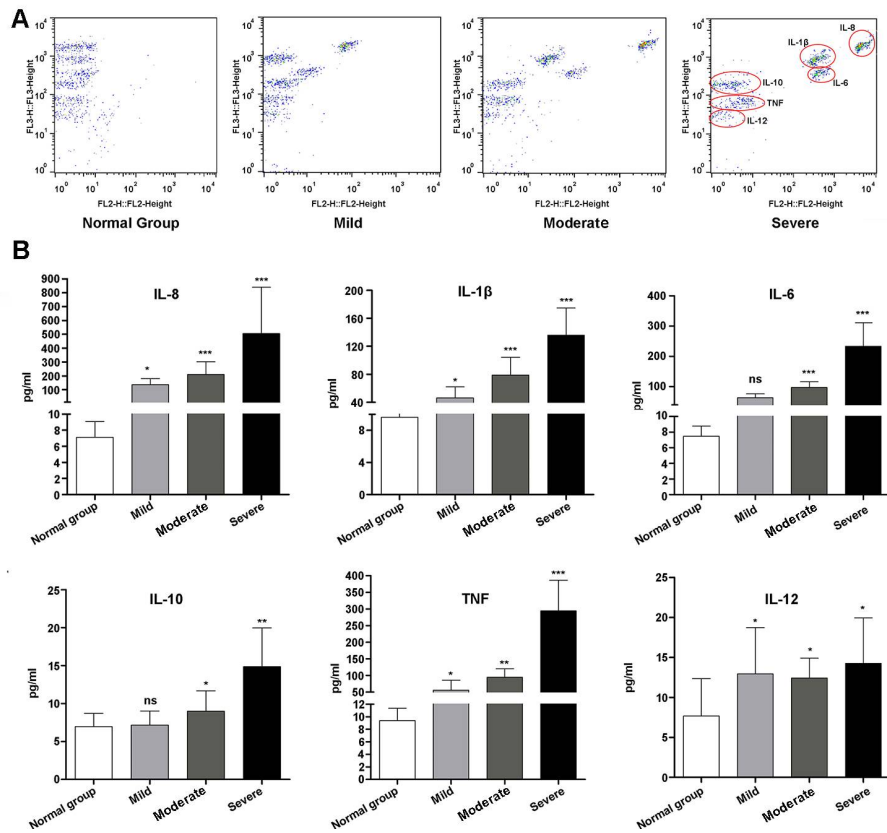

4 (A) Expression of IL-8, IL-1β, IL-6, IL-10, TNF and IL-12 in patients with different stages of  
5 UC and normal group by cytometric bead array.

6 (B) The quantitative results of IL-8, IL-1β, IL-6, IL-10, TNF and IL-12. Data are shown as  
7 mean values ± SEM (\*p<0.05, \*\*p<0.01, \*\*\*p<0.001).

8 **Supplemental figure 2. The relative expression of IL-9R in four cell lines**

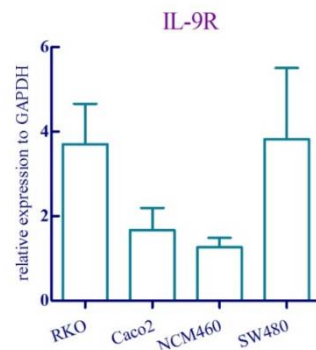

9 Expression of IL-9R mRNA was measured by q-PCR in four cell lines, RKO, Caco2,  
10 NCM460 and SW480.

11 **Supplemental figure 3. Detection of SOCS3 overexpression by Western blot in SW480**  
12 **cells.**

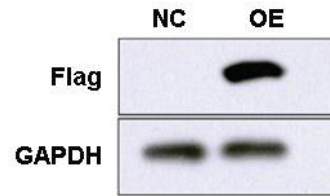

13 Expression of SOCS3 protein was measured by western blot in SW480 cell. GAPDH was  
14 used as internal control.
